# Supplementary material for: [Et3NH][HSO4]-mediated functionalization of hippuric acid: an unprecedented approach to 4-arylidene-2-phenyl-5(4H)-oxazolones
Source: Royal Society of Chemistry journal article supplement (doi:10.1039/c5ra09290f), 2015-01-01
Supplement: c5ra09290f1.pdf [file c5ra09290f1.pdf]

## Supplementary Information

### **[Et<sub>3</sub>NH][HSO<sub>4</sub>]-mediated functionalization of hippuric acid: an unprecedented approach to 4-arylidene-2-phenyl-5(4*H*)-oxazolones**

Mehtab Parveen,<sup>\*a</sup> Faheem Ahmad,<sup>a</sup> Ali Mohammed Malla,<sup>a</sup> Shaista Azaz,<sup>a</sup> Manuela Ramos Silva<sup>b</sup> and P. S. Pereira Silva<sup>b</sup>

<sup>a</sup>*Division of Organic Synthesis, Aligarh Muslim University, Aligarh, 202002, India*

<sup>b</sup>*CEMDRX Physics Department, University of Coimbra, 3004-516 Coimbra, Portugal*

---

<sup>\*</sup>*Corresponding author: Mehtab Parveen*  
*E-mail: mehtab.organic2009@gmail.com; Tel: +91-9897179498*

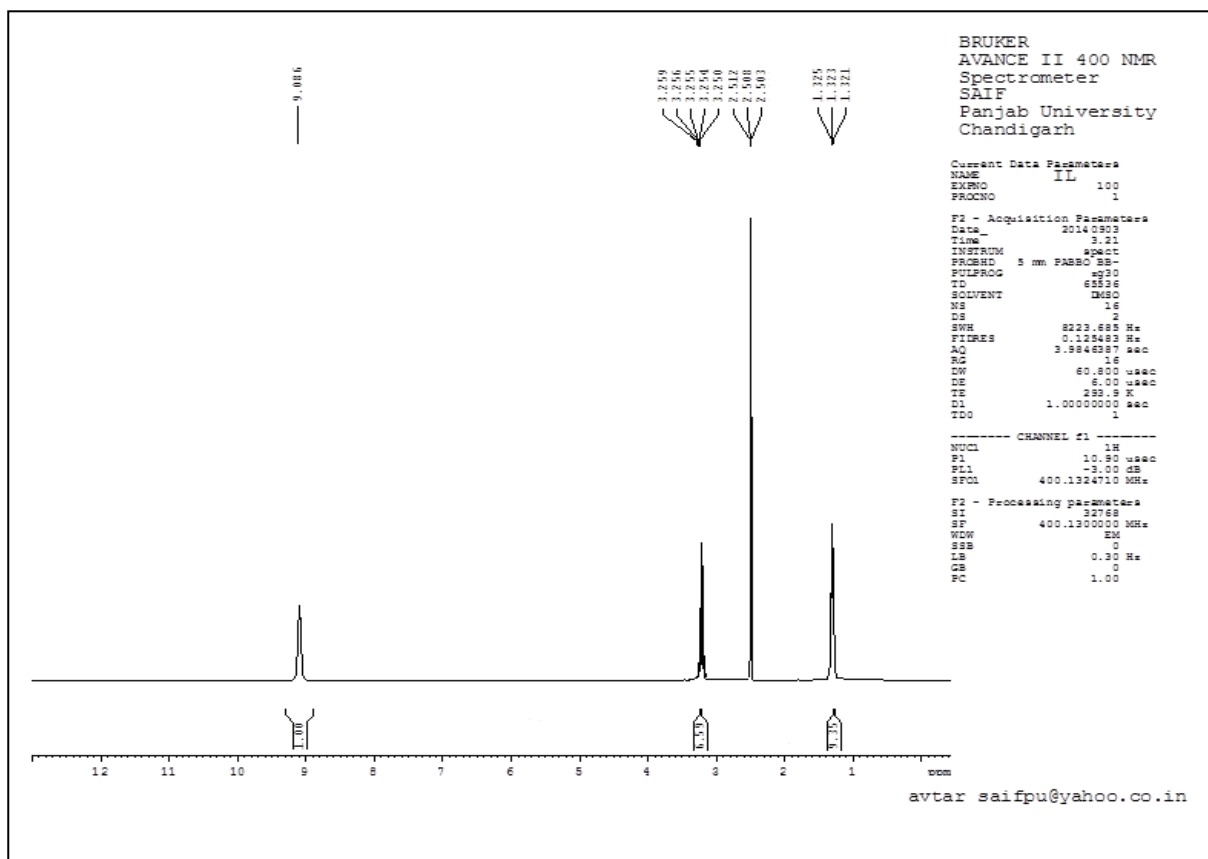

Fig. S1  $^1\text{H}$ -NMR of ionic liquid

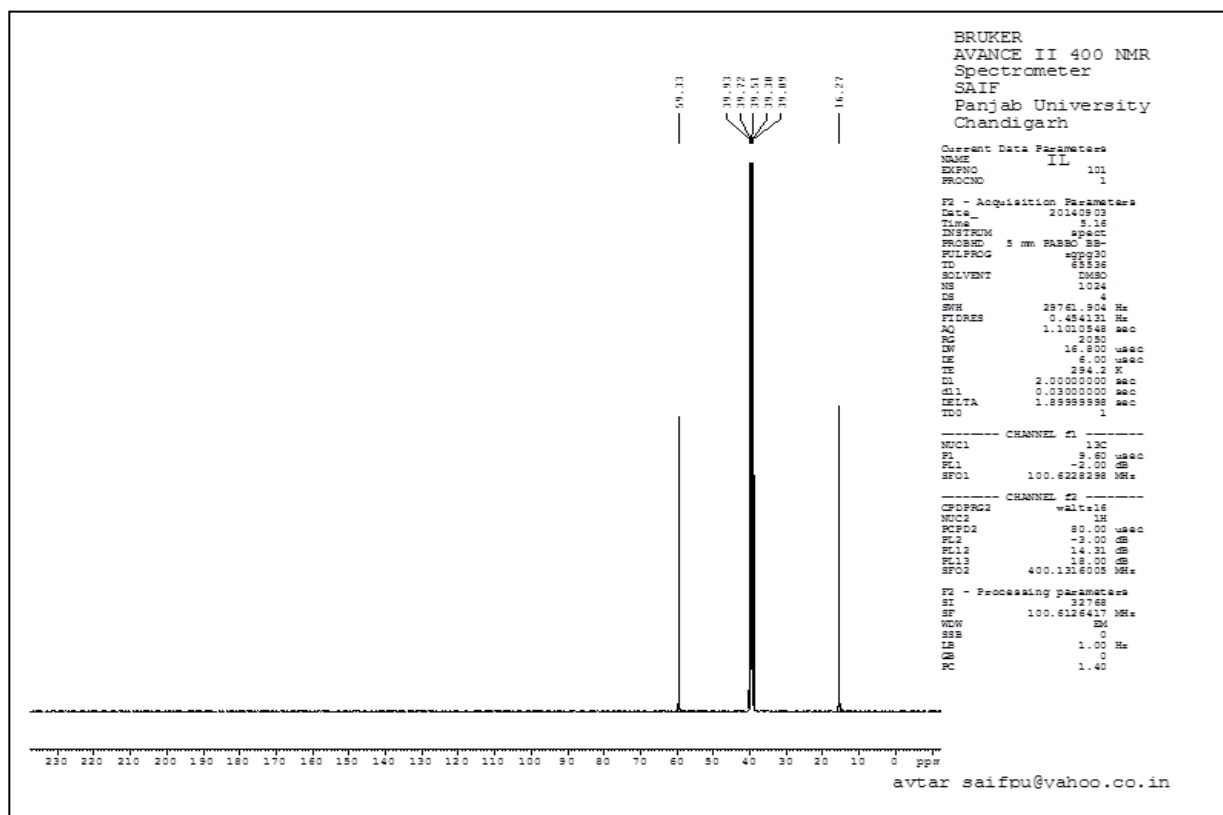

Fig. S2  $^{13}\text{C}$ -NMR of ionic liquid

## $^1\text{H}$ and $^{13}\text{C}$ NMR spectra of synthesized compounds

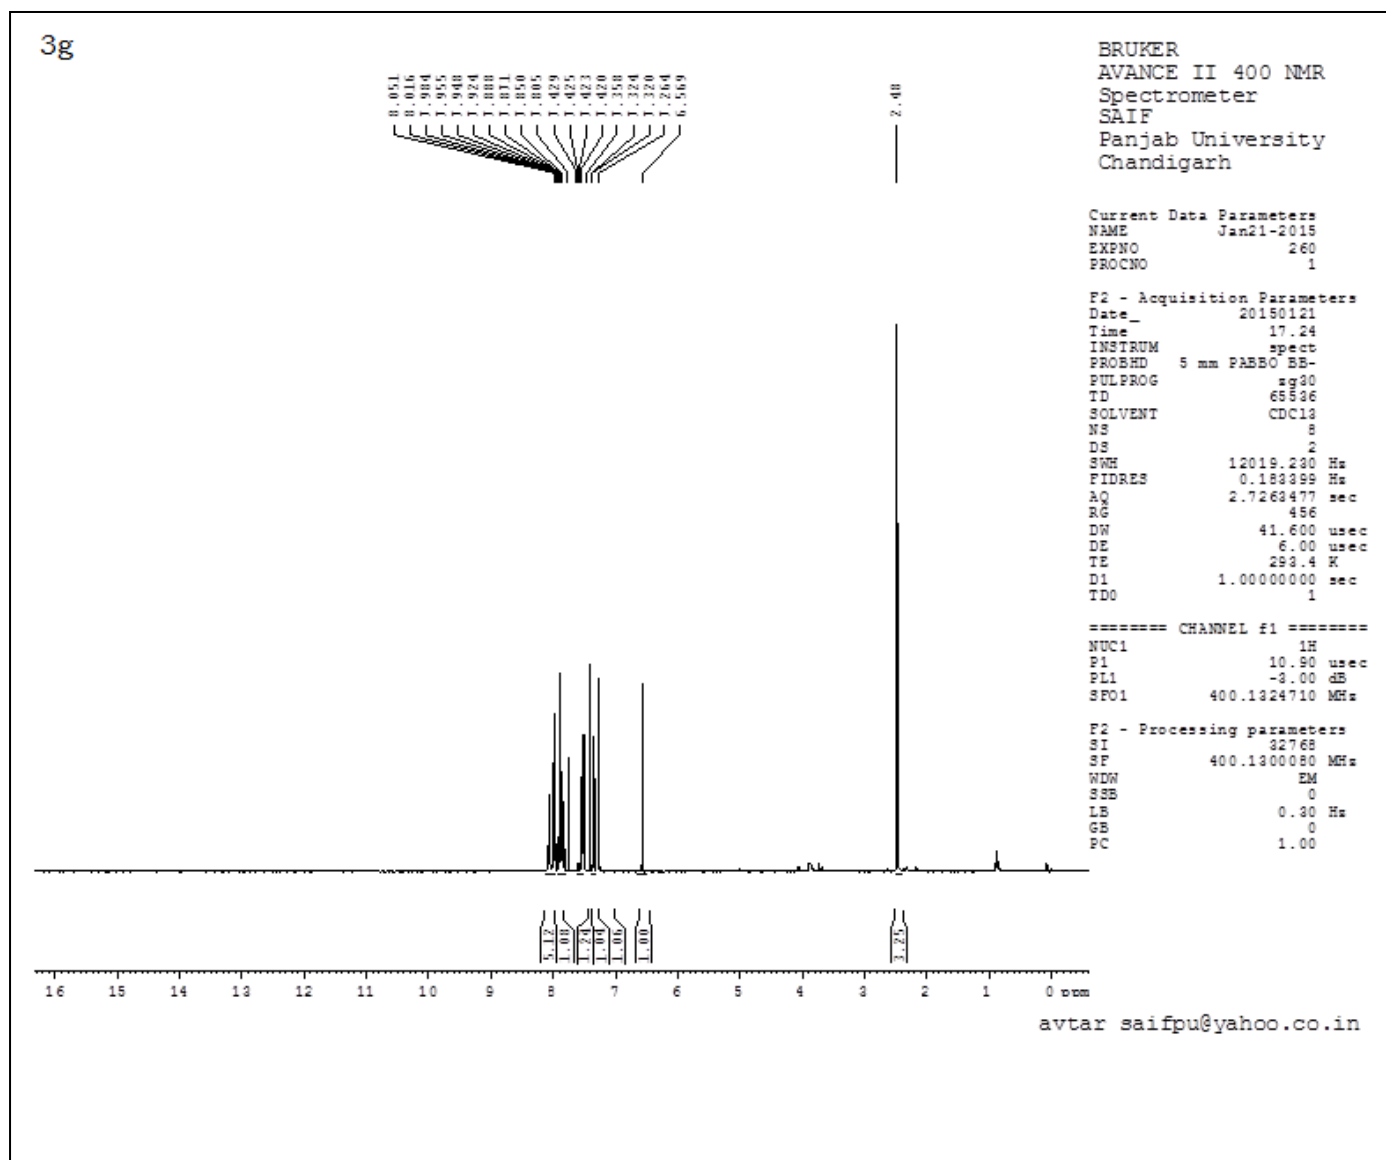

$^1\text{H}$  NMR of compound 3g

3g

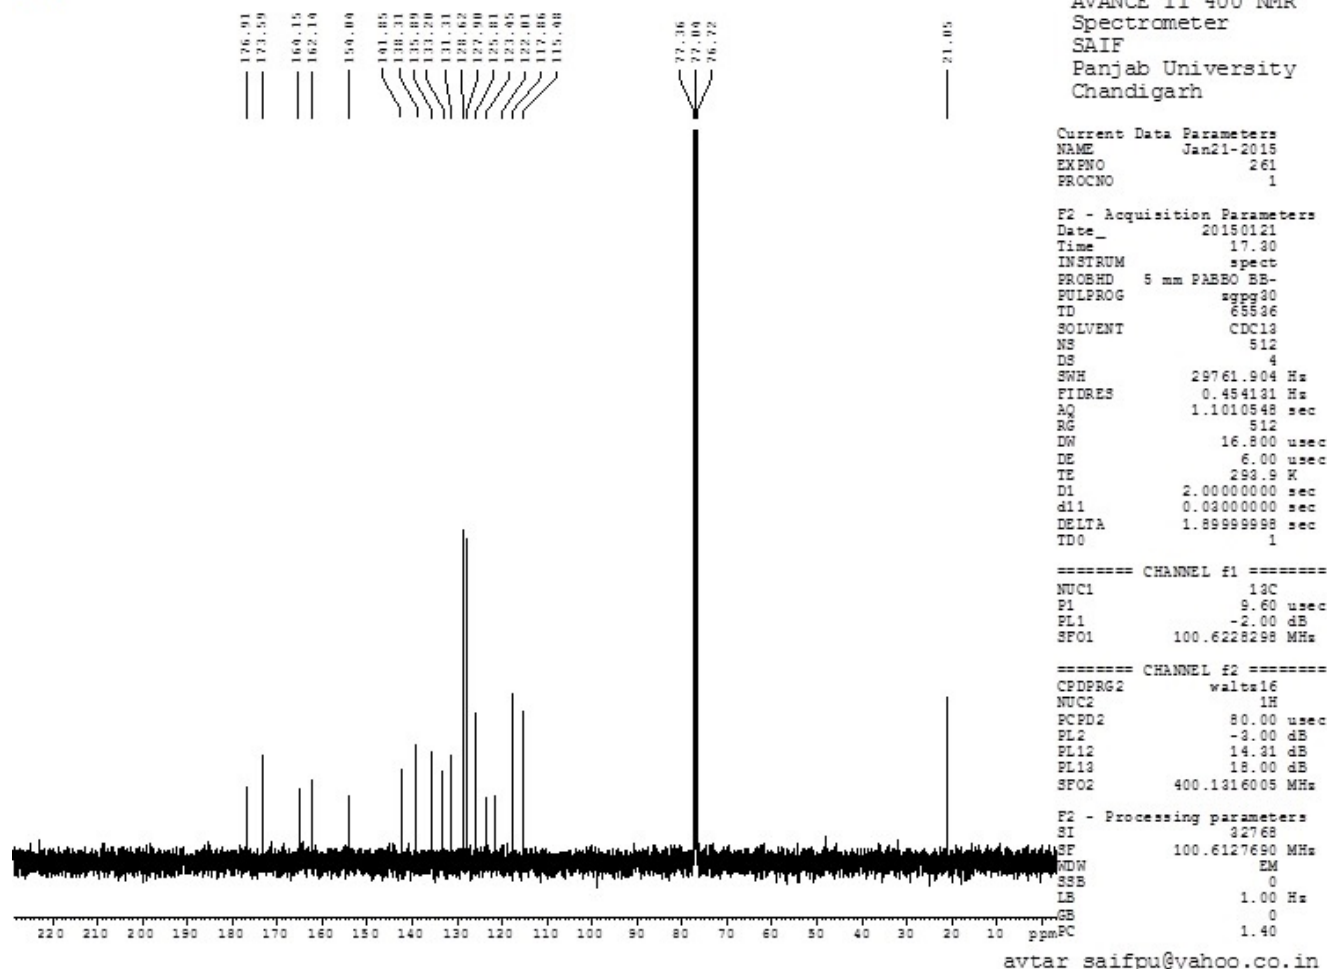

<sup>13</sup>C NMR of compound 3g

3i

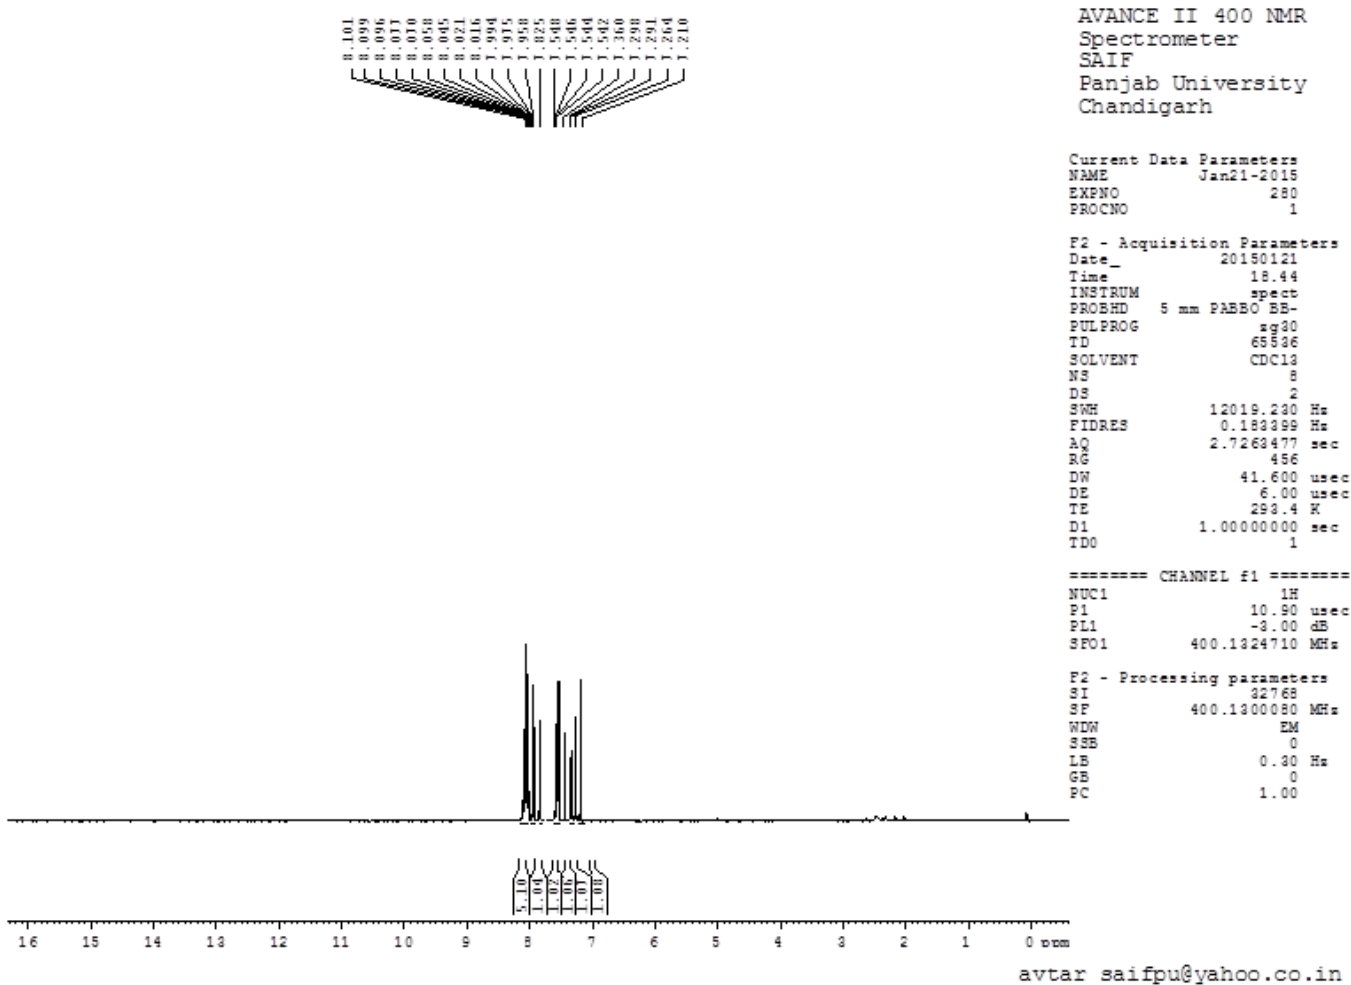

<sup>1</sup>H NMR of compound 3i

3i

BRUKER  
 AVANCE II 400 NMR  
 Spectrometer  
 SAIF  
 Panjab University  
 Chandigarh

Current Data Parameters  
 NAME Jan21-2018  
 EXPNO 281  
 PROCNO 1

F2 - Acquisition Parameters  
 Date\_ 20150121  
 Time 18.51  
 INSTRUM spect  
 PROBHD 5 mm PABBO BB-  
 PULPROG zgpg30  
 TD 65536  
 SOLVENT CDCl3  
 NS 512  
 DS 4  
 SWH 29761.904 Hz  
 FIDRES 0.454131 Hz  
 AQ 1.1010848 sec  
 RG 512  
 DW 16.800 usec  
 DE 6.00 usec  
 TE 293.2 K  
 D1 2.00000000 sec  
 d11 0.03000000 sec  
 DELTA 1.89999998 sec  
 TDO 1

===== CHANNEL f1 =====  
 NUC1 13C  
 P1 9.60 usec  
 PL1 -2.00 dB  
 SFO1 100.6228298 MHz

===== CHANNEL f2 =====  
 CPDPRG2 waltz16  
 NUC2 1H  
 PCPD2 80.00 usec  
 PL2 -2.00 dB  
 PL12 14.31 dB  
 PL13 18.00 dB  
 SFO2 400.1316005 MHz

F2 - Processing parameters  
 SI 32768  
 SF 100.6127690 MHz  
 NDN EM  
 SSB 0  
 LB 1.00 Hz  
 GB 0  
 PC 1.40

avtar saifpu@yahoo.co.in

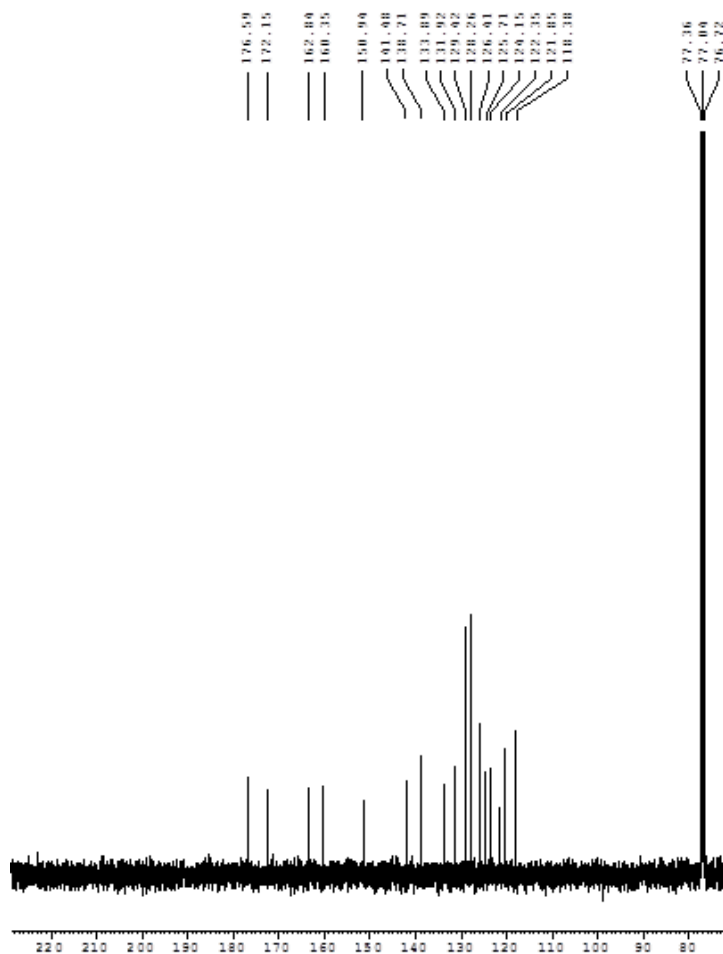

$^{13}\text{C}$  NMR of compound 3i

[illegible]

BRUKER  
AVANCE II 400 NMR  
Spectrometer  
SAIF  
Panjab University  
Chandigarh

```
Current Data Parameters
NAME          Jan21-2015
EXPNO          270
PROCNO         1
```

```

F2 - Acquisition Parameters
Date_      20180121
Time       17.58
INSTRUM    spect
PROBHD     5 mm PABBO BB-
PULPROG    zg30
TD         65536
SOLVENT    CDCl3
NS         8
DS         2
SWH         12019.230  Hz
FIDRES     0.183399  Hz
AQ         2.7263477  sec
RG         512
DNW        41.600  usec
DE         6.00  usec
TE         293.4  K
D1         1.00000000  sec
TD0        1

```

```
===== CHANNEL f1 =====
NUC1          1H
P1             10.90 usec
PL1            -3.00 dB
SFO1          400.1324710 MHz
```

```
F2 - Processing parameters
SI                      32768
SF                      400.1300094 MHz
WDW                      EM
SSE                      0
LB                      0.30 Hz
GB                      0
PC                      1.00
```

avtar saifpu@yahoo.co.in

### <sup>1</sup>H NMR of compound 3k

3k

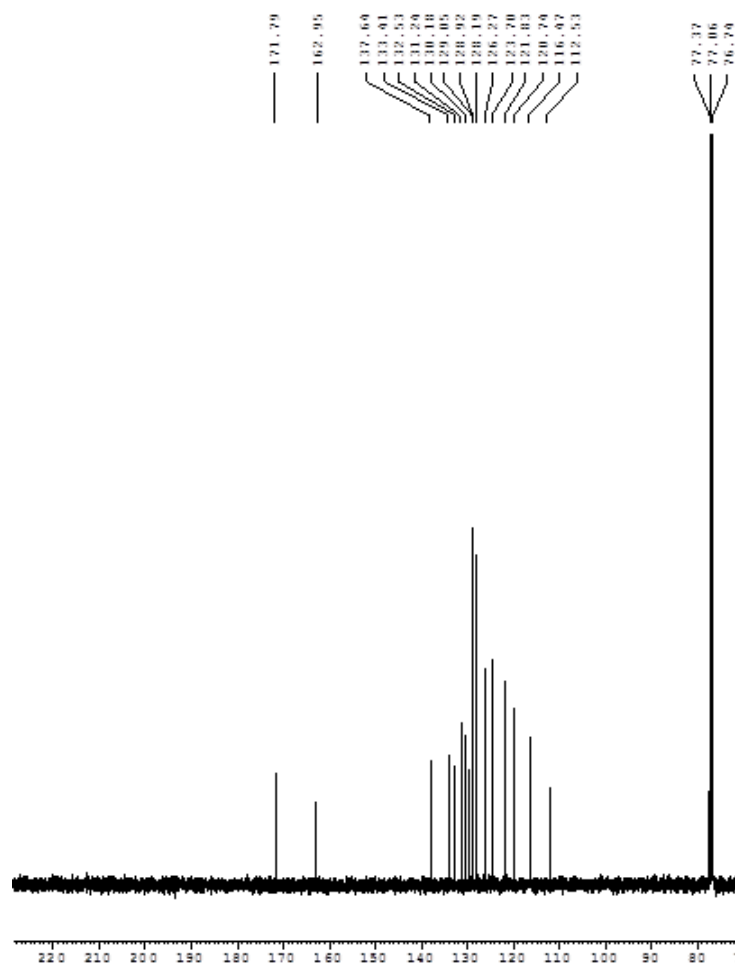

BRUKER  
AVANCE II 400 NMR  
Spectrometer  
SAIF  
Panjab University  
Chandigarh

Current Data Parameters  
NAME Jan21-2015  
EXPNO 271  
PROCNO 1

F2 - Acquisition Parameters  
Date\_ 20150121  
Time\_ 18.26  
INSTRUM spect  
PROBHD 5 mm PABBO BB-  
PULPROG zgpg30  
TD 65536  
SOLVENT CDCl3  
NS 512  
DS 4  
SWH 29761.904 Hz  
FIDRES 0.454131 Hz  
AQ 1.1010548 sec  
RG 875  
DW 16.800 usec  
DE 6.00 usec  
TE 293.7 K  
D1 2.00000000 sec  
d11 0.03000000 sec  
DELTA 1.89999998 sec  
TD0 1

===== CHANNEL f1 =====  
NUC1 13C  
P1 9.60 usec  
PL1 -2.00 dB  
SFO1 100.6228298 MHz

===== CHANNEL f2 =====  
CPDPRG2 waltz16  
NUC2 1H  
PCPD2 80.00 usec  
PL2 -3.00 dB  
PL12 14.31 dB  
PL13 18.00 dB  
SFO2 400.1316005 MHz

F2 - Processing parameters  
SI 32768  
SF 100.6127690 MHz  
WDW EM  
SSE 0  
LB 1.00 Hz  
GB 0  
PC 1.40

avtar saifpu@yahoo.co.in

<sup>13</sup>C NMR of compound 3k



3n

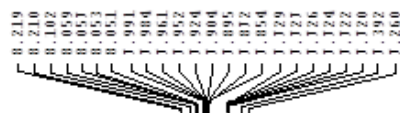

BRUKER  
AVANCE II 400 NMR  
Spectrometer  
SAIF  
Panjab University  
Chandigarh

Current Data Parameters  
NAME Jan21-2015  
EXPNO 290  
PROCNO 1

F2 - Acquisition Parameters  
Date\_ 20150121  
Time 18.58  
INSTRUM spect  
PROBHD 5 mm PABBO BB-  
PULPROG zg30  
TD 65536  
SOLVENT CDCl3  
NS 8  
DS 2  
SWH 12019.230 Hz  
FIDRES 0.183399 Hz  
AQ 2.7263477 sec  
RG 512  
DW 41.600 usec  
DE 6.00 usec  
TE 293.4 K  
D1 1.00000000 sec  
TD0 1

===== CHANNEL f1 =====  
NUC1 1H  
P1 10.90 usec  
PL1 -3.00 dB  
SFO1 400.1324710 MHz

F2 - Processing parameters  
SI 32768  
SF 400.1300094 MHz  
WDW EM  
SSE 0  
LB 0.30 Hz  
GB 0  
PC 1.00

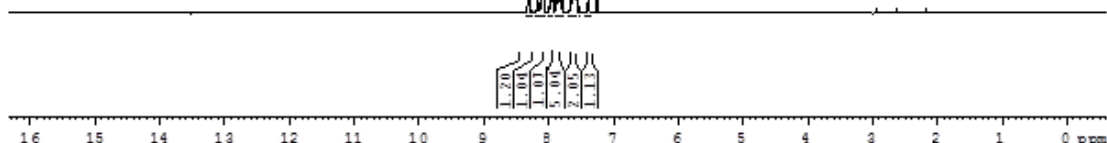

avtar saifpu@yahoo.co.in

**<sup>1</sup>H NMR of compound 3n**

3n

BRUKER  
AVANCE II 400 NMR  
Spectrometer  
SAIF  
Panjab University  
Chandigarh

Current Data Parameters  
NAME Jan21-2015  
EXPNO 291  
PROCNO 1

F2 - Acquisition Parameters  
Date\_ 20150121  
Time 19.26  
INSTRUM spect  
PROBHD 5 mm PABBO BB-  
PULPROG zgpg30  
TD 65536  
SOLVENT CDCl3  
NS 512  
DS 4  
SWH 29761.904 Hz  
FIDRES 0.454131 Hz  
AQ 1.1010548 sec  
RG 575  
DW 16.800 usec  
DE 6.00 usec  
TE 293.7 K  
D1 2.00000000 sec  
d11 0.03000000 sec  
DELTA 1.89999998 sec  
TD0 1

===== CHANNEL f1 =====  
NUC1 13C  
P1 9.60 usec  
PL1 -2.00 dB  
SFO1 100.6228298 MHz

===== CHANNEL f2 =====  
CPDPRG2 waltz16  
NUC2 1H  
PCPD2 80.00 usec  
PL2 -3.00 dB  
PL12 14.31 dB  
PL13 18.00 dB  
SFO2 400.1316005 MHz

F2 - Processing parameters  
SI 32768  
SF 100.6127690 MHz  
WDW EM  
SSB 0  
LB 1.00 Hz  
GB 0  
PC 1.40

avtar saifpu@yahoo.co.in

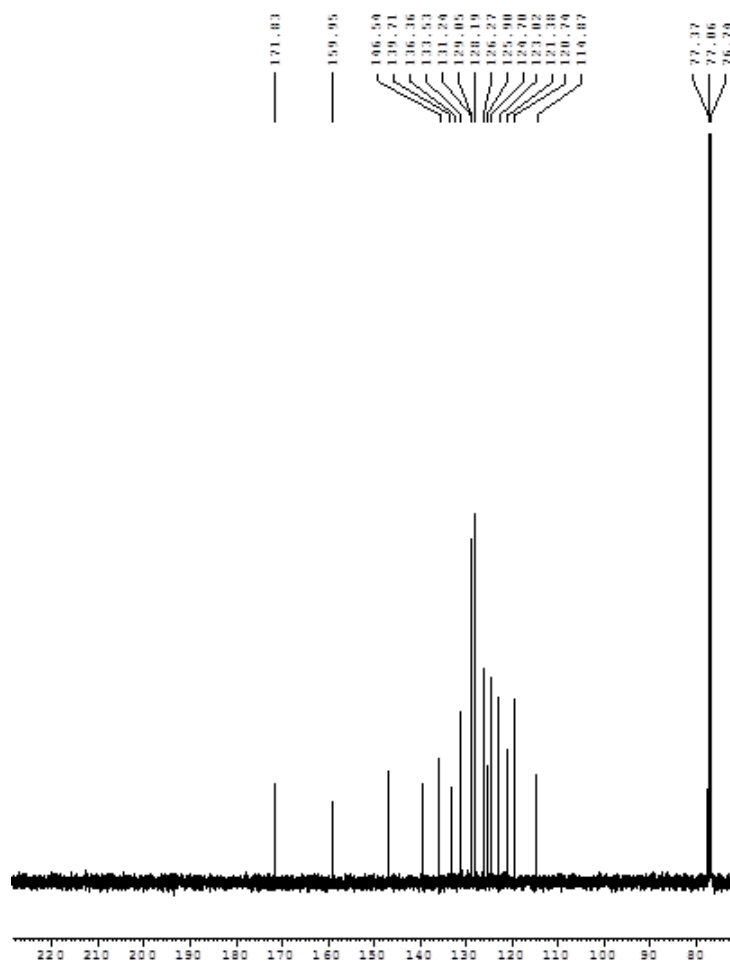

<sup>13</sup>C NMR of compound 3n
